# Supplementary material
Source: MDPI journal article supplement (https://www.mdpi.com/2072-4292/14/22/5790)
Supplement: s1 [file s1 › remotesensing-1973663-supplementary.pdf]

## Analyzing satellite-derived 3D building inventories and quantifying urban growth towards active faults: a case study of Bishkek, Kyrgyzstan

C. Scott Watson <sup>1</sup>, John R. Elliott <sup>1</sup>, Ruth M.J. Amey <sup>1</sup>, and Kanatbek E. Abdrakhmatov <sup>2</sup>

1. COMET, School of Earth and Environment, University of Leeds, LS2 9JT, UK

2. Institute of Seismology, National Academy of Sciences, Bishkek, Kyrgyzstan

### Contents of this file

Figures S1 to S4

Tables S1 to S7

### Figures

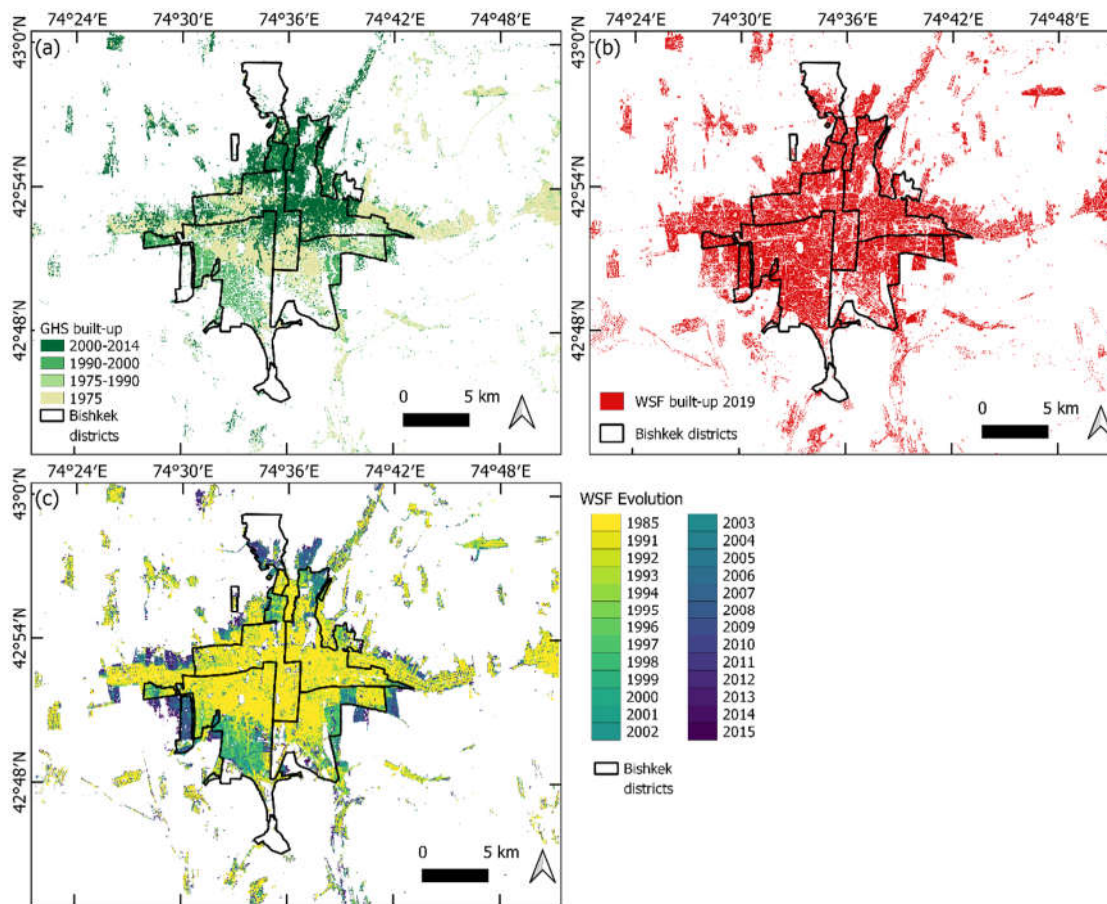

**Figure S1.** Bishkek's urban growth quantified by global datasets including the Global Human Settlement (a), World Settlement Footprint (b), and World Settlement Evolution (c).

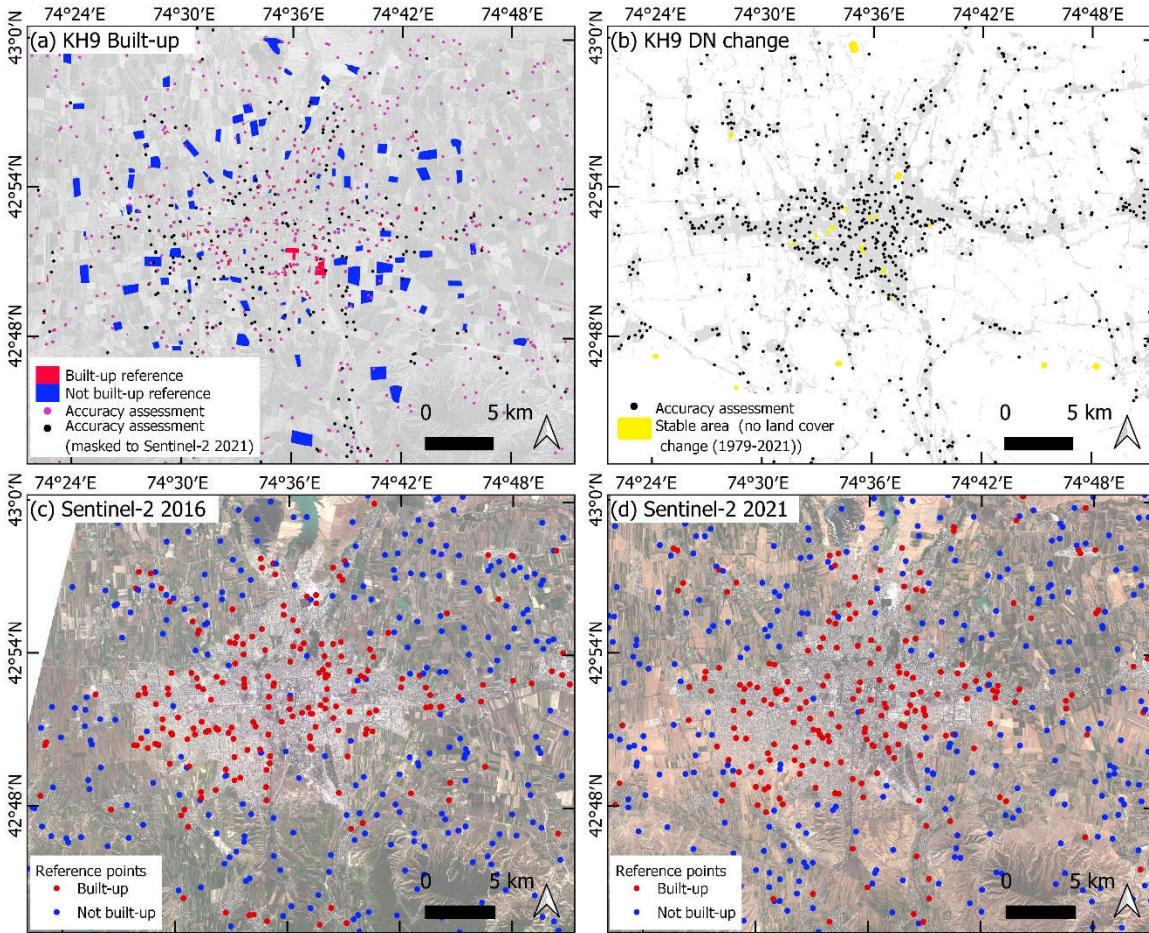

**Figure S2.** (a) Reference polygons used as training data for the KH-9 built-up classification. Accuracy assessment points are also shown for the KH-9 built-up classification, and the KH-9 classification masked to the built-up area classified using 2021 Sentinel-2 imagery. (b) Stable areas used to quantify DN values for masking out areas of insignificant change when investigating areas of the city that underwent redevelopment or vegetation growth. Accuracy assessment points are also shown for the DN change analysis. Accuracy assessment points for the deep learning classification applied to Sentinel-2 imagery from 2016 (c) and 2021 (d).

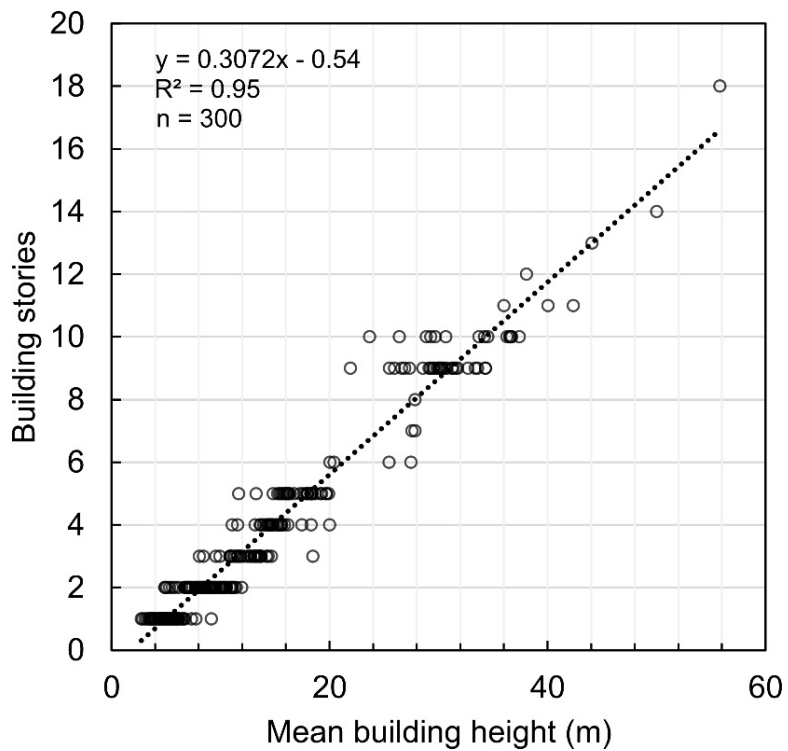

**Figure S3.** Relationship between the number of building stories and building height for a sample of 300 buildings in Bishkek. Building stories were derived by counting vertical window occurrence in Google Street View (imagery from 2015). Building heights were derived from the 2013 Pleiades data.

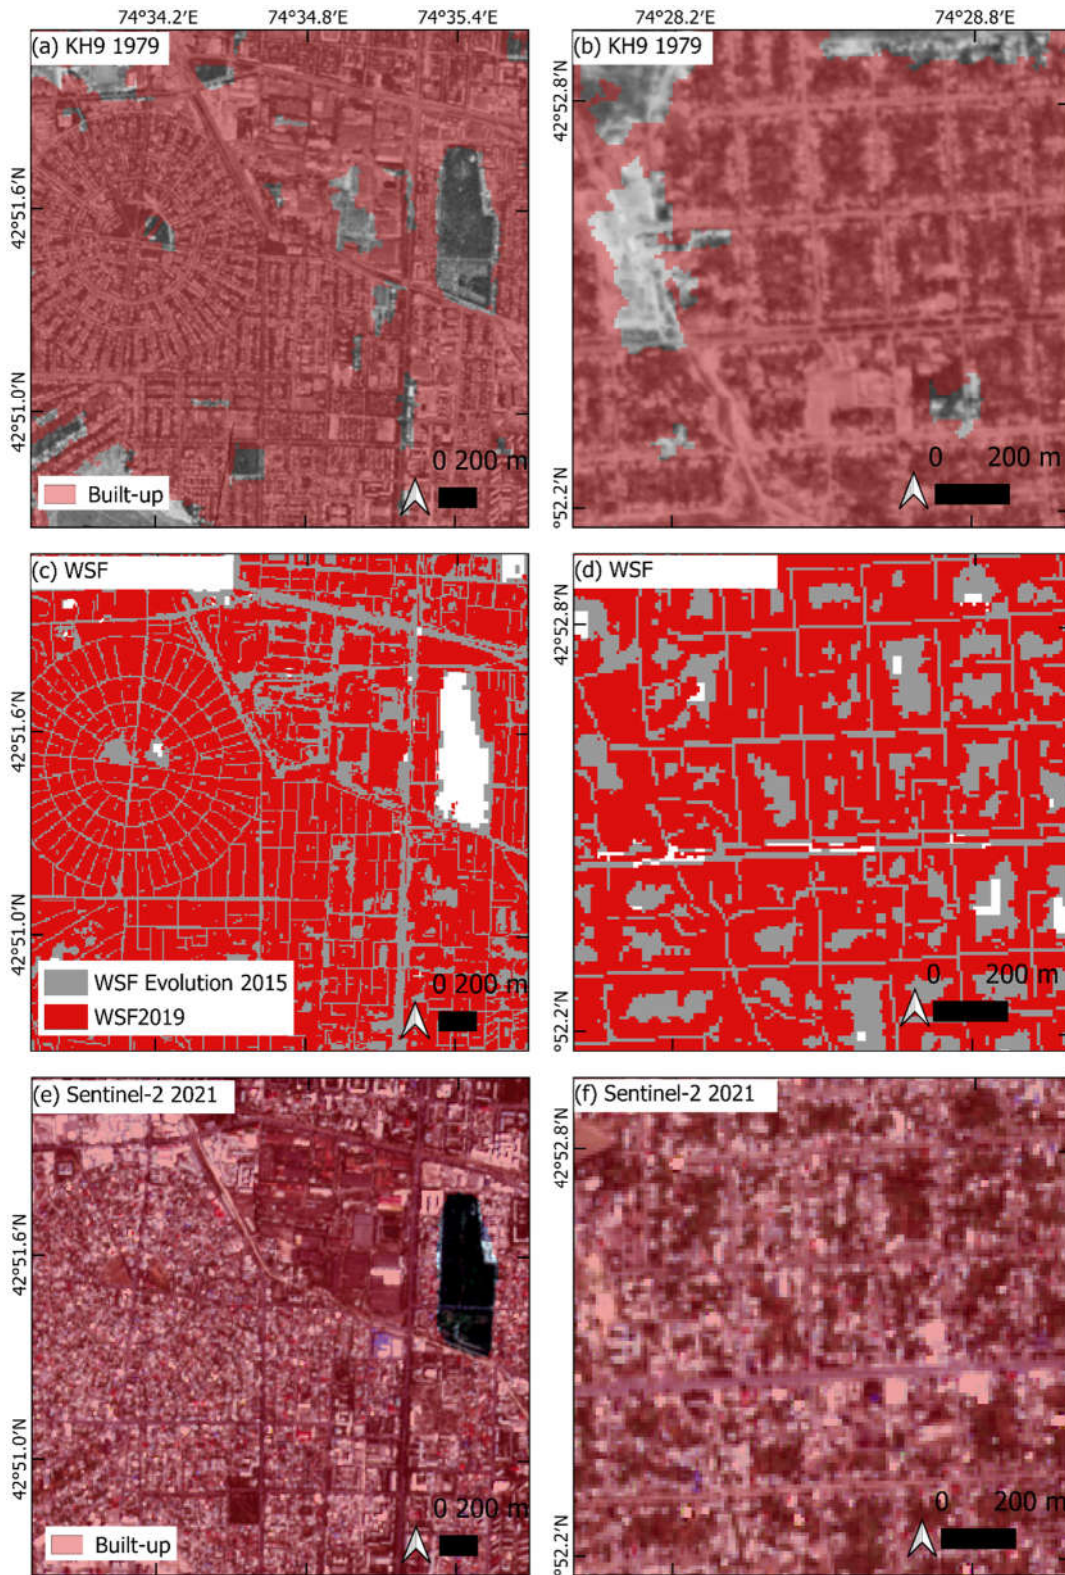

**Figure S4.** Examples of built-up area classification for the KH-9 analysis (a–b), World Settlement Footprint (c–d), and Sentinel-2 2021 (e–f). Panels in the left column (a, c, e) and right column (b, d, f) show the built-up classifications over two areas of Bishkek.

## Tables

**Table S1.** Optical satellite image IDs used in this study.

| Sensor                | Date                               | Image ID                                    | Type* |
|-----------------------|------------------------------------|---------------------------------------------|-------|
| KH-9                  | 21 Jun                             | DZB1215-500445L005001                       | P     |
|                       | 1979                               | DZB1215-500445L006001                       | P     |
| Pleiades 1A           | 02 Nov<br>2013                     | IMG_PHR1A_P_201311020601148_SEN_4171456101  | P     |
|                       |                                    | IMG_PHR1A_P_201311020600371_SEN_4171456101  | P     |
|                       |                                    | IMG_PHR1A_P_201311020600579_SEN_4171456101  | P     |
|                       |                                    | IMG_PHR1A_MS_201311020601148_SEN_4171456101 | MS    |
|                       |                                    | IMG_PHR1A_MS_201311020600371_SEN_4171456101 | MS    |
|                       |                                    | IMG_PHR1A_MS_201311020600579_SEN_4171456101 | MS    |
| WorldView-2           | 10 Oct<br>2019                     | 19OCT10061235-P2AS-011789242010_01_P001     | P     |
|                       |                                    | 19OCT10061333-P2AS-011789242010_01_P001     | P     |
|                       |                                    | 19OCT10061235-M2AS-011789242010_01_P001     | MS    |
|                       |                                    | 19OCT10061333-M2AS-011789242010_01_P001     | MS    |
| PlanetScope<br>PSB.SD | 19 Mar<br>2021 –<br>15 Apr<br>2021 | 20210319_050619_97_242d_1B_AnalyticMS       | MS    |
|                       |                                    | 20210319_050622_32_242d_1B_AnalyticMS       | MS    |
|                       |                                    | 20210319_050624_68_242d_1B_AnalyticMS       | MS    |
|                       |                                    | 20210319_051318_00_2251_1B_AnalyticMS       | MS    |
|                       |                                    | 20210319_051320_25_2251_1B_AnalyticMS       | MS    |
|                       |                                    | 20210319_051322_51_2251_1B_AnalyticMS       | MS    |
|                       |                                    | 20210324_050457_31_2442_1B_AnalyticMS       | MS    |
|                       |                                    | 20210324_050459_79_2442_1B_AnalyticMS       | MS    |
|                       |                                    | 20210324_055334_99_2408_1B_AnalyticMS       | MS    |
|                       |                                    | 20210324_055337_26_2408_1B_AnalyticMS       | MS    |
|                       |                                    | 20210325_051425_61_2251_1B_AnalyticMS       | MS    |
|                       |                                    | 20210325_051427_87_2251_1B_AnalyticMS       | MS    |
|                       |                                    | 20210325_051430_12_2251_1B_AnalyticMS       | MS    |
|                       |                                    | 20210327_051418_89_227e_1B_AnalyticMS       | MS    |
|                       |                                    | 20210327_051421_16_227e_1B_AnalyticMS       | MS    |
|                       |                                    | 20210327_051511_79_222f_1B_AnalyticMS       | MS    |
|                       |                                    | 20210327_051514_14_222f_1B_AnalyticMS       | MS    |
|                       |                                    | 20210403_051052_16_2441_1B_AnalyticMS       | MS    |
|                       |                                    | 20210403_051054_45_2441_1B_AnalyticMS       | MS    |
|                       |                                    | 20210403_055537_59_2426_1B_AnalyticMS       | MS    |
|                       |                                    | 20210403_055539_85_2426_1B_AnalyticMS       | MS    |
|                       |                                    | 20210408_051206_27_227e_1B_AnalyticMS       | MS    |
|                       |                                    | 20210408_051208_57_227e_1B_AnalyticMS       | MS    |
|                       |                                    | 20210408_051210_86_227e_1B_AnalyticMS       | MS    |
|                       |                                    | 20210408_055609_44_2412_1B_AnalyticMS       | MS    |
|                       |                                    | 20210408_055611_79_2412_1B_AnalyticMS       | MS    |
|                       |                                    | 20210408_055614_14_2412_1B_AnalyticMS       | MS    |
|                       |                                    | 20210410_050315_69_2434_1B_AnalyticMS       | MS    |
|                       |                                    | 20210410_050318_03_2434_1B_AnalyticMS       | MS    |
|                       |                                    | 20210410_050320_37_2434_1B_AnalyticMS       | MS    |
|                       |                                    | 20210411_050150_38_241b_1B_AnalyticMS       | MS    |
|                       |                                    | 20210411_050152_72_241b_1B_AnalyticMS       | MS    |
|                       |                                    | 20210411_050342_26_2456_1B_AnalyticMS       | MS    |
|                       |                                    | 20210411_050344_74_2456_1B_AnalyticMS       | MS    |
|                       |                                    | 20210411_051242_16_222f_1B_AnalyticMS       | MS    |
|                       |                                    | 20210411_051244_51_222f_1B_AnalyticMS       | MS    |
|                       |                                    | 20210411_051246_86_222f_1B_AnalyticMS       | MS    |
|                       |                                    | 20210412_050212_77_2445_1B_AnalyticMS       | MS    |

|                                       |                                          |                                        |                                               |
|---------------------------------------|------------------------------------------|----------------------------------------|-----------------------------------------------|
|                                       |                                          | 20210412_050215_11_2445_1B_AnalyticMS  | MS                                            |
|                                       |                                          | 20210412_050217_45_2445_1B_AnalyticMS  | MS                                            |
|                                       |                                          | 20210415_050208_40_242b_1B_AnalyticMS  | MS                                            |
|                                       |                                          | 20210415_051457_74_2233_1B_AnalyticMS  | MS                                            |
|                                       |                                          | 20210415_051459_95_2233_1B_AnalyticMS  | MS                                            |
| Sentinel-2                            | 10 Jun 2016                              | 20160610T055206_20160614T013109_T43TDH | MS                                            |
|                                       | 08 Jun 2017                              | 20170608T055641_20170608T060226_T43TDH | MS                                            |
|                                       | 23 Jun 2018                              | 20180623T055641_20180623T060540_T43TDH | MS                                            |
|                                       | 13 Jun 2019                              | 20190613T055639_20190613T060236_T43TDH | MS                                            |
|                                       | 14 Jun 2020                              | 20200614T054639_20200614T054940_T43TDH | MS                                            |
|                                       | 27 Jun 2021                              | 20210627T055641_20210627T055934_T43TDH | MS                                            |
|                                       | WorldView-3<br>(Google Earth<br>Basemap) | 11 Apr 2021                            | Maxar IDs: 104001006869470 and 040010068A89A0 |
| 22 Jul 2021                           |                                          | Maxar ID: 104001006C038C0              |                                               |
| 25 Oct 2021                           |                                          | Maxar ID: 104001006F17740              |                                               |
|                                       |                                          |                                        |                                               |
| *P – Panchromatic. MS - Multispectral |                                          |                                        |                                               |

**Table S2.** Comparison between field-measured building heights and those derived from the DSM-DTM difference for Pleiades and WorldView-2 data.

| Building ID | Field height (2019)<br>(m) ± Standard<br>Deviation | Pleiades (2013) DSM-<br>DTM height (m) ±<br>Standard Deviation | WorldView-2 (2019)<br>DSM-DTM height (m)<br>± Standard Deviation |
|-------------|----------------------------------------------------|----------------------------------------------------------------|------------------------------------------------------------------|
| 1           | 16.3 ± 0.2                                         | 17.9 ± 0.7                                                     | 17.6 ± 0.7                                                       |
| 2           | 16.6 ± 0.1                                         | 18.2 ± 0.4                                                     | 18.7 ± 0.7                                                       |
| 3           | 16.7 ± 0.2                                         | 18.5 ± 1.8                                                     | 18.4 ± 0.5                                                       |
| 4           | 17.2 ± 0.9                                         | 14.6 ± 1.1                                                     | 14.8 ± 1.4                                                       |
| 5           | 26.7 ± 0.2                                         | Not built                                                      | 25.9 ± 3.8                                                       |
| 6           | 28.8 ± 0.2                                         | 29.8 ± 0.6                                                     | 29.5 ± 0.6                                                       |
| 7           | 28.8 ± 0.1                                         | 30.3 ± 0.6                                                     | 22.5 ± 5.9                                                       |
| 8           | 31.4 ± 0                                           | 32.7 ± 0.8                                                     | 31.8 ± 0.6                                                       |
| 9           | 31.7 ± 0.1                                         | 27.6 ± 8                                                       | 30.5 ± 1.1                                                       |
| 10          | 32.7 ± 0.1                                         | 34.1 ± 1.2                                                     | 34.5 ± 2.5                                                       |
| 11          | 57.2 ± 1.9                                         | 57.7 ± 0.8                                                     | 58 ± 1.2                                                         |

**Table S3.** KH9 1979 built-up area accuracy assessment (masked to Sentinel-2 2021 built-up extent) using 500 validation points. The validation points were used to report area-adjusted classification confidence intervals and producer's, user's, and overall accuracy percentages (see: Olofsson et al., 2014, Olofsson et al., 2013). Briefly, these error-adjusted metrics use the validation points to weight the classified areas accounting for omission or commission within each class. Confidence intervals are the same where the number of classes equals two, since errors are dependent. Overall accuracy is the correctly mapped proportion of the area. Producer's accuracy is the proportion of the area in a class according to the reference (ground truth) information that is also mapped as that class. User's accuracy is the proportion of the area mapped as a class that belonged to that class according to the reference information.

|                                                 | Built-up | Not built-up |
|-------------------------------------------------|----------|--------------|
| Classified area (km <sup>2</sup> )              | 171.3    | 165.6        |
| Error-adjusted area (km <sup>2</sup> )          | 153.4    | 183.4        |
| 95% confidence interval area (km <sup>2</sup> ) | 11.1     | 11.1         |
| Producer's accuracy (%)                         | 87.0     | 79.4         |
| User's accuracy (%)                             | 78.0     | 88.0         |
| Overall accuracy (%)                            | 82.9     |              |

**Table S4.** Sentinel-2 2016 accuracy assessment.

|                                                 | Built-up | Not built-up |
|-------------------------------------------------|----------|--------------|
| Classified area (km <sup>2</sup> )              | 310.1    | 975.7        |
| Error-adjusted area (km <sup>2</sup> )          | 272.7    | 1013.0       |
| 95% confidence interval area (km <sup>2</sup> ) | 24.0     | 24.0         |
| Producer's accuracy (%)                         | 91.4     | 94.0         |
| User's accuracy (%)                             | 80.4     | 97.6         |
| Overall accuracy (%)                            | 93.4     |              |

**Table S5.** Sentinel-2 2021 accuracy assessment.

|                                                 | Built-up | Not built-up |
|-------------------------------------------------|----------|--------------|
| Classified area (km <sup>2</sup> )              | 337.3    | 1008.3       |
| Error-adjusted area (km <sup>2</sup> )          | 292.7    | 1052.8       |
| 95% confidence interval area (km <sup>2</sup> ) | 22.5     | 22.5         |
| Producer's accuracy (%)                         | 94.4     | 94.2         |
| User's accuracy (%)                             | 82.0     | 98.4         |
| Overall accuracy (%)                            | 94.3     |              |

**Table S6.** KH9 1979 land cover change accuracy assessment.

|                                                 | No change | Digital number decrease (vegetation increase) | Digital number increase (built-up redevelopment) |
|-------------------------------------------------|-----------|-----------------------------------------------|--------------------------------------------------|
| Classified area (km <sup>2</sup> )              | 108.1     | 59.1                                          | 58.1                                             |
| Error-adjusted area (km <sup>2</sup> )          | 116.5     | 43.9                                          | 64.8                                             |
| 95% confidence interval area (km <sup>2</sup> ) | 6.8       | 4.1                                           | 6.1                                              |
| Producer's accuracy (%)                         | 76.1      | 92.6                                          | 66.3                                             |

|                      |    |      |    |
|----------------------|----|------|----|
| User's accuracy (%)  | 82 | 68.8 | 74 |
| Overall accuracy (%) |    | 76.4 |    |

**Table S7.** Acquisition information for tri-stereo (Pleiades) and stereo (WorldView-2) imagery.

| Sensor/ Acquisition date      | Image ID                                | Details                                                                                                                                                                                   |
|-------------------------------|-----------------------------------------|-------------------------------------------------------------------------------------------------------------------------------------------------------------------------------------------|
| Pleiades-1A/ 02 November 2013 | PHR1A_P_201311020601148_SEN_4171456101  | Incidence Angle: 12.10°<br>Incidence Angle (Across Track): 1.38°<br>Incidence Angle (Along Track): 12.03°<br>Orientation angle: 180.00°<br>Sun azimuth: 167.42°<br>Sun elevation: 31.63°  |
|                               | PHR1A_P_201311020600579_SEN_4171456101  | Incidence Angle: 4.35°<br>Incidence Angle (Across Track): 3.84°<br>Incidence Angle (Along Track): 2.05°<br>Orientation angle: 179.98°<br>Sun azimuth: 167.14°<br>Sun elevation: 31.8°     |
|                               | PHR1A_P_201311020600371_SEN_4171456101  | Incidence Angle: 12.32°<br>Incidence Angle (Across Track): 6.83°<br>Incidence Angle (Along Track): -10.35°<br>Orientation angle: 179.98°<br>Sun azimuth: 167.15°<br>Sun elevation: 31.58° |
| WorldView-2/ 10 October 2019  | 19OCT10061235-P2AS-011789242010_01_P001 | Incidence Angle (Across Track): -9.70°<br>Incidence Angle (Along Track): 23.2°<br>Sun azimuth: 168.2°<br>Sun elevation: 40.1°                                                             |
|                               | 19OCT10061333-P2AS-011789242010_01_P001 | Incidence Angle (Across Track): -11.2°<br>Incidence Angle (Along Track): -3.9°<br>Sun azimuth: 168.5°<br>Sun elevation: 40.2°                                                             |

## References

- Olofsson, P., Foody, G. M., Herold, M., Stehman, S. V., Woodcock, C. E. & Wulder, M. A. 2014. Good practices for estimating area and assessing accuracy of land change. *Remote Sensing of Environment*, 148, 42-57.
- Olofsson, P., Foody, G. M., Stehman, S. V. & Woodcock, C. E. 2013. Making better use of accuracy data in land change studies: Estimating accuracy and area and quantifying uncertainty using stratified estimation. *Remote Sensing of Environment*, 129, 122-131.
